# Supplementary material
Source: publisher figshare collection journal article supplement (https://acs.figshare.com/ndownloader/files/4637350)
Supplement: Supplementary file 1 [file 4637350]

## Supporting Information

### Practical Asymmetric Synthesis of Trifluoromethyl-containing Aminoester Using A Modified Davis Protocol

Asaf Alimardanov,\* Jean Schmid, Jay Afragola, Gulnaz Khafizova  
Wyeth Research, 401 N. Middletown Rd., Pearl River, NY 10965

#### Table of Contents

|                                   |     |
|-----------------------------------|-----|
| General Experimental Methods..... | S-1 |
| Compound 3.....                   | S-1 |
| Compounds 4, 5.....               | S-2 |
| Compounds 6, 7.....               | S-3 |
| Compounds 9, 10.....              | S-4 |
| Compound 1.....                   | S-5 |

#### General Experimental Methods

$^1\text{H}$  NMR spectra were recorded at 300 MHz in  $\text{CDCl}_3$  using tetramethylsilane as a standard.  $^{13}\text{C}$  NMR spectra were recorded at 75 MHz in  $\text{CDCl}_3$ . Anhydrous THF was purchase from EMD Chemicals and used without further purification.

#### NMR Spectra

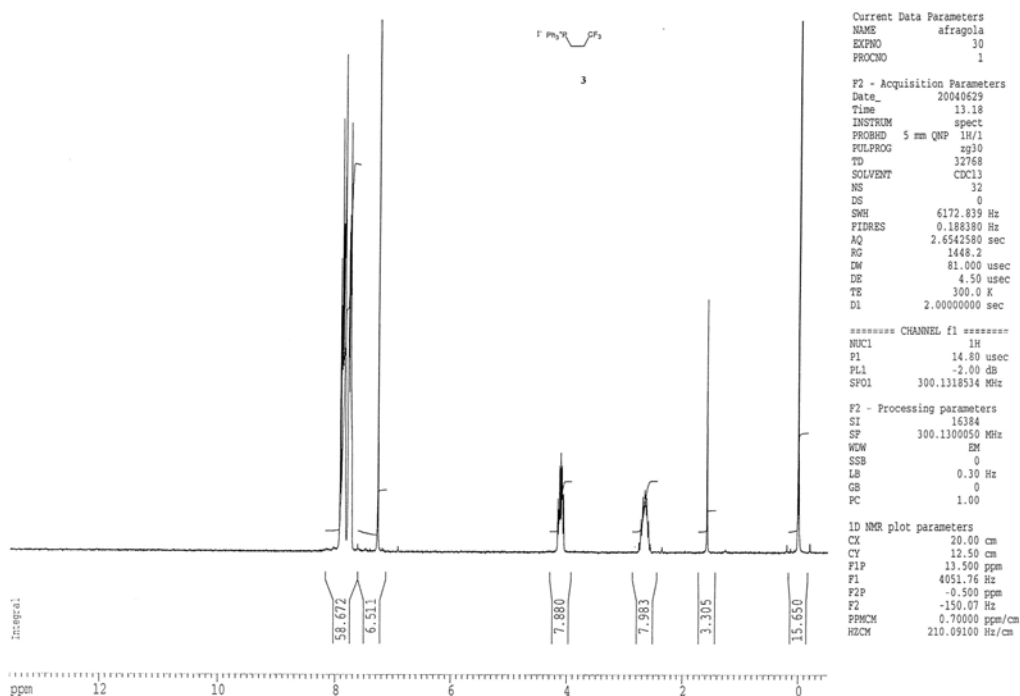

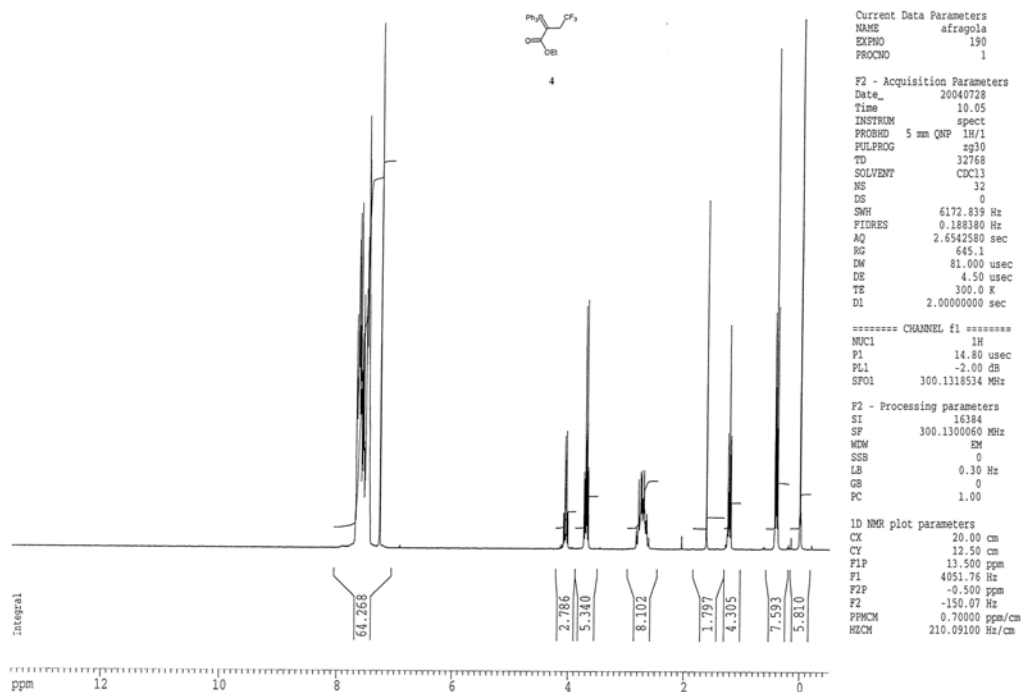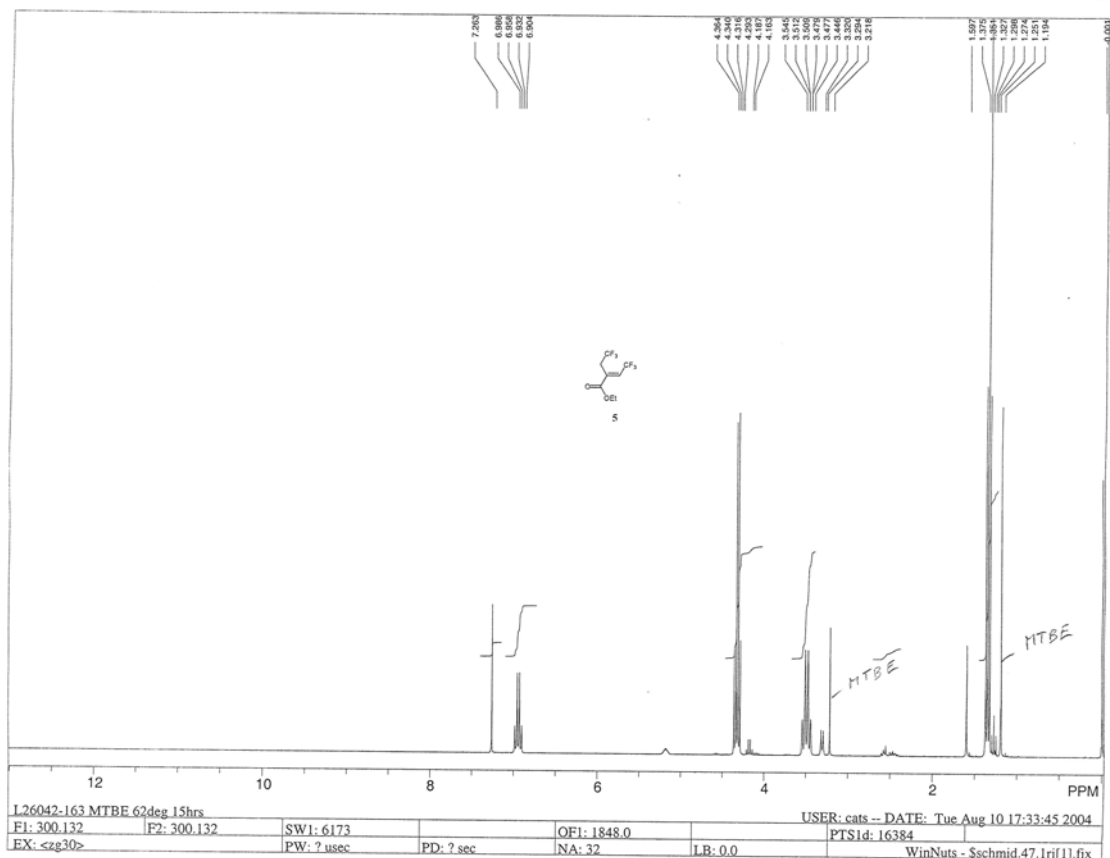

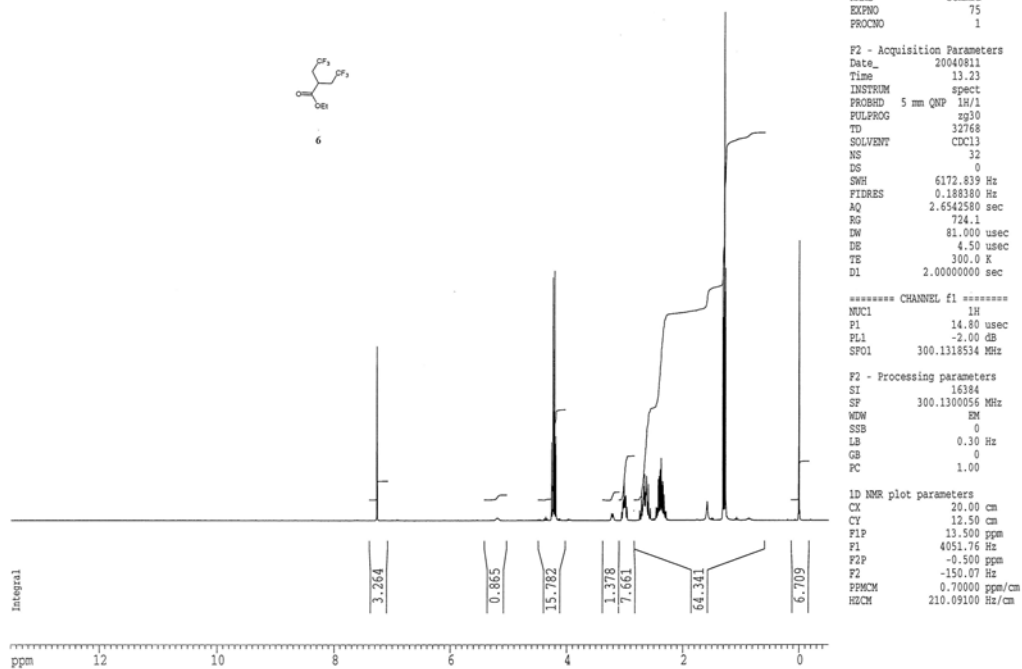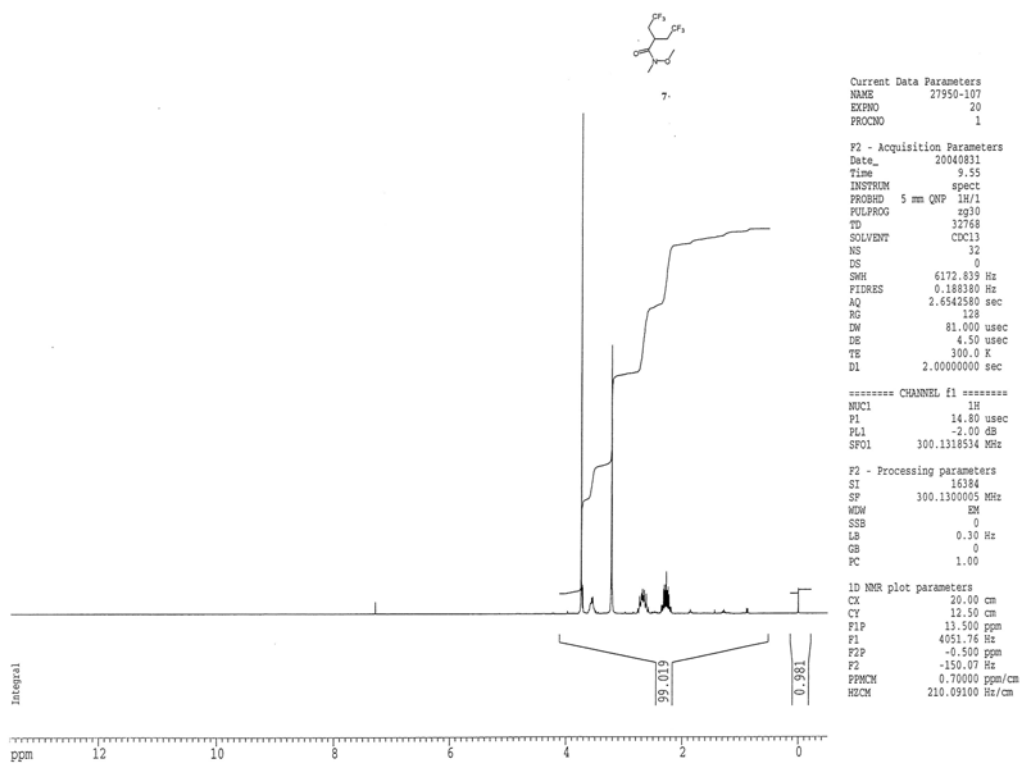

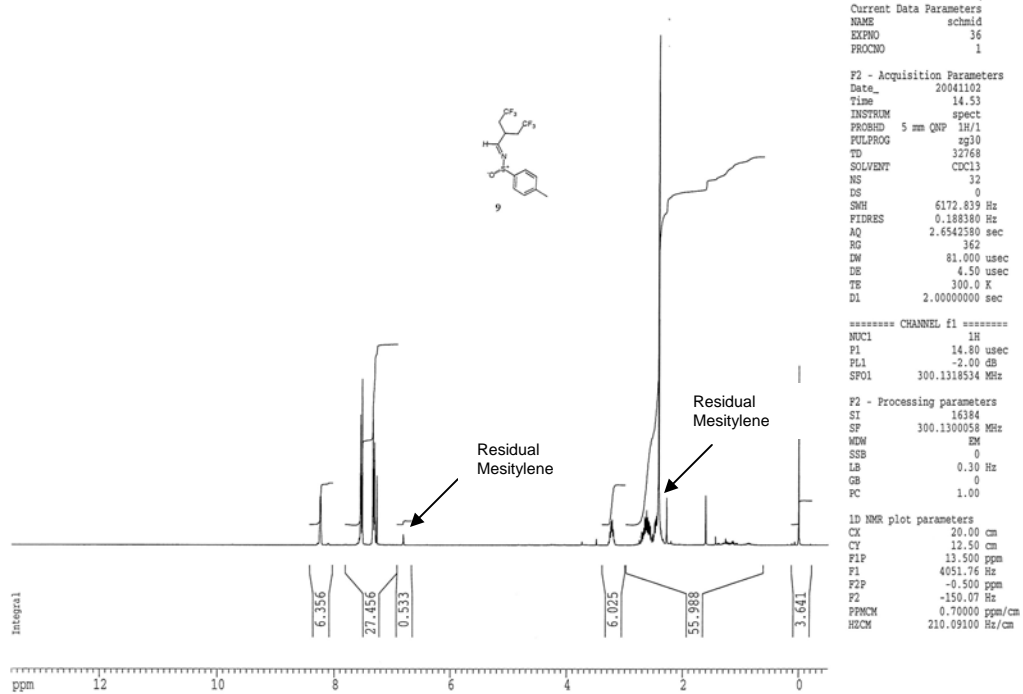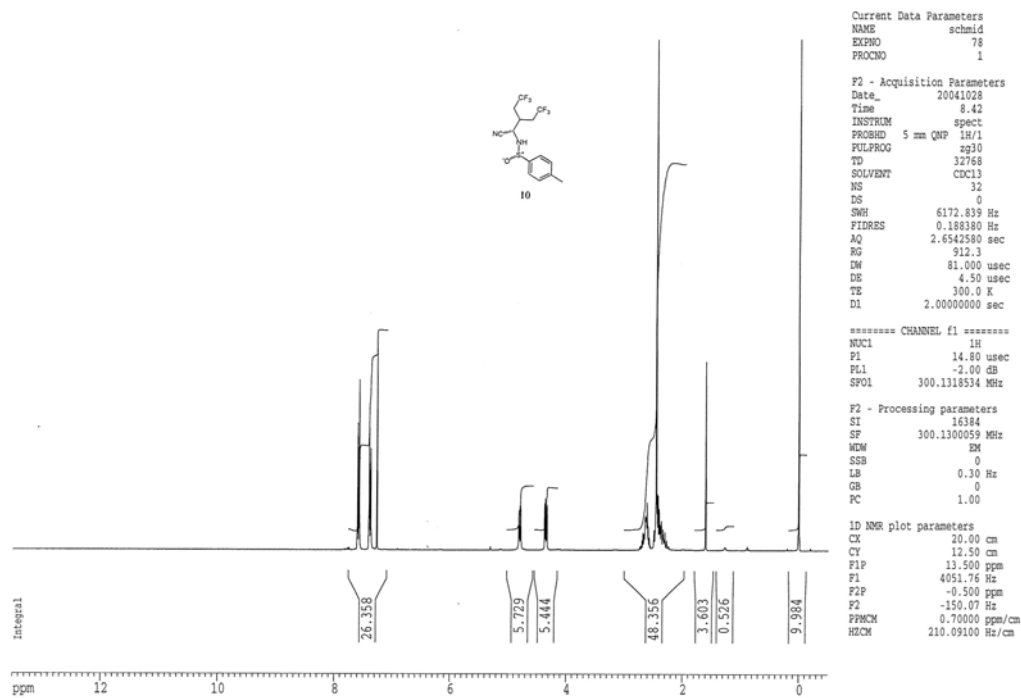

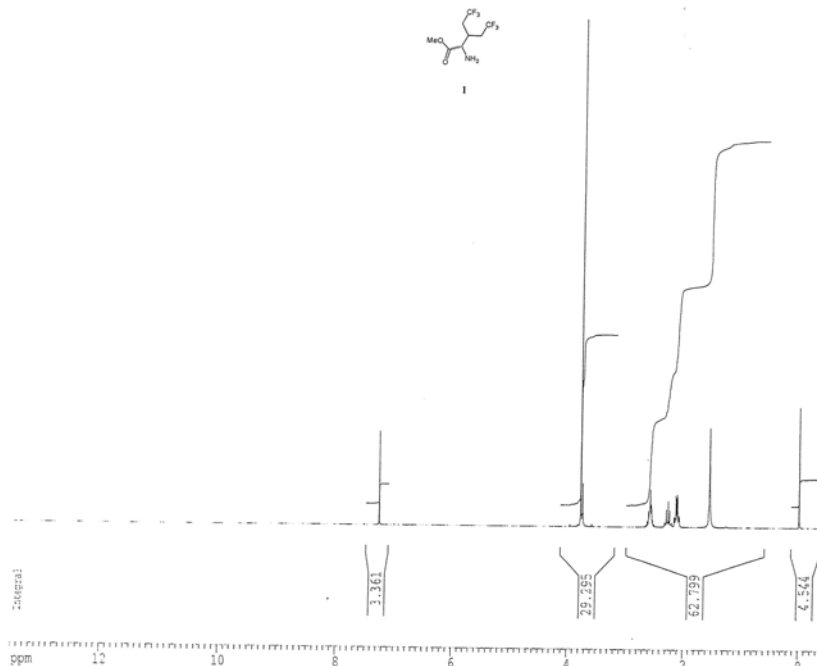

Current Data Parameters  
 NAME 418852  
 EXPNO 10  
 PROCNO 1

F2 - Acquisition Parameters  
 Date\_ 20070806  
 Time 17.40  
 INSTRUM spect  
 PROBRID 5 mm BBO BB-1H  
 PULPROG zg30  
 TD 32768  
 SOLVENT CDCl3  
 NS 96  
 DS 0  
 SMI 8250.825 Hz  
 FIDRES 0.251795 Hz  
 AQ 1.9857908 sec  
 RG 322.5  
 DW 60.600 usec  
 DE 6.00 usec  
 TE 298.2 K  
 D1 1.5000000 sec

===== CHANNEL f1 =====  
 NUC1 1H  
 P1 10.45 usec  
 PL1 -1.00 dB  
 SFO1 400.324722 MHz

F2 - Processing parameters  
 SI 32768  
 SF 400.3300064 MHz  
 WDW RM  
 SSB 0  
 LB 0.30 Hz  
 GB 0  
 PC 4.00

1D NMR plot parameters  
 CX 20.00 cm  
 CY 12.50 cm  
 FIP 13.500 ppm  
 FI 5404.46 Hz  
 F2P -0.500 ppm  
 F2 -200.17 Hz  
 PPMH 0.10000 ppm/cm  
 HZCM 280.23102 Hz/cm

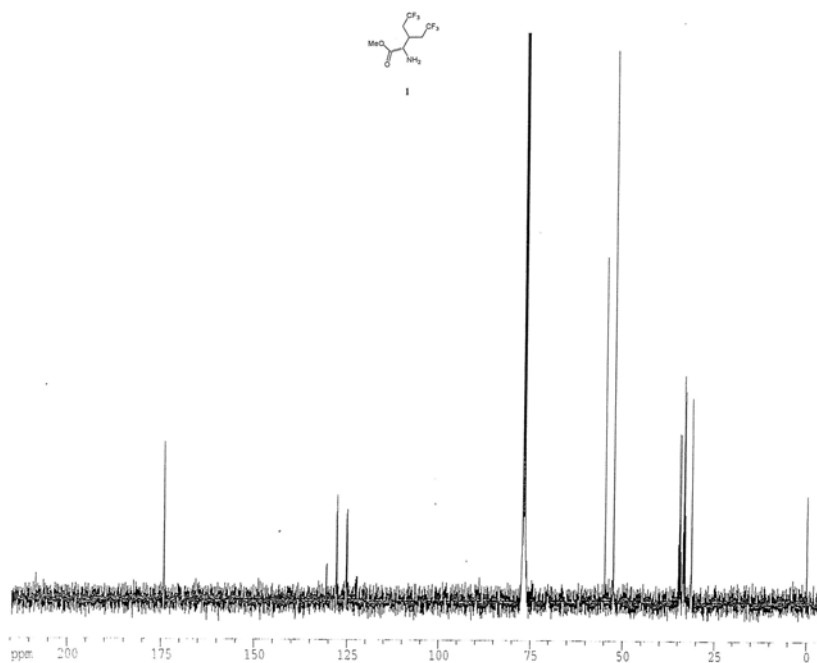

Current Data Parameters  
 NAME 418852  
 EXPNO 11  
 PROCNO 1

F2 - Acquisition Parameters  
 Date\_ 20070806  
 Time 19.59  
 INSTRUM spect  
 PROBRID 5 mm BBO BB-1H  
 PULPROG zgpg30  
 TD 65536  
 SOLVENT CDCl3  
 NS 6144  
 DS 2  
 SMI 28239.766 Hz  
 FIDRES 0.446163 Hz  
 AQ 1.1207156 sec  
 RG 7296.2  
 DW 17.100 usec  
 DE 4.90 usec  
 TE 300.0 K  
 D1 0.20000000 sec  
 d11 0.01000000 sec  
 d12 0.00020000 sec

===== CHANNEL f1 =====  
 NUC1 13C  
 P1 12.00 usec  
 PL1 4.10 dB  
 SFO1 100.6757321 MHz

===== CHANNEL f2 =====  
 CHARGE2 wait216  
 NUC2 1H  
 P2P2 75.00 usec  
 PL2 -4.00 dB  
 PL12 15.50 dB  
 PL11 15.50 dB  
 SFO2 400.1416011 MHz

F2 - Processing parameters  
 SI 32768  
 SF 100.640447 MHz  
 WDW RM  
 SSB 0  
 LB 1.00 Hz  
 GB 0  
 PC 1.40

1D NMR plot parameters  
 CX 20.00 cm  
 CY 14.00 cm  
 FIP 215.2500 ppm  
 FI 11642.54 Hz  
 F2P -5.000 ppm  
 F2 -991.11 Hz  
 PPMH 11.00000 ppm/cm  
 HZCM 1107.29358 Hz/cm
